# Supplementary material
Source: publisher figshare collection journal article supplement (https://acs.figshare.com/ndownloader/files/18028769)
Supplement: Supplementary file 1 [file 18028769]

# Improve Anti-alveolar Echinococcosis Efficacy of Albendazole by a Novel Nano-crystalline Formulation with Enhanced Oral Bioavailability

(Supporting Information)

Chunhui Hu,<sup>†,‡</sup> Zhengsheng Liu,<sup>†</sup> Chengyu Liu,<sup>†</sup> Yaogang Zhang,<sup>▽</sup> Haining Fan,<sup>‡,\*</sup> Feng Qian<sup>†,\*</sup>

<sup>†</sup> School of Pharmaceutical Sciences, Collaborative Innovation Center for Diagnosis and Treatment of Infectious Diseases, and Key Laboratory of Bioorganic Phosphorus Chemistry & Chemical Biology (Ministry of Education), Tsinghua University, Beijing 100084, P. R. China.

<sup>‡</sup> Medical College, Qinghai University, Qinghai, 810001, P. R. China.

<sup>▽</sup> Qinghai Research Key Laboratory for Echinococcosis, Affiliated Hospital of Qinghai University, Qinghai, 810001, P. R. China.

<sup>‡</sup> Department of Hepatopancreatobiliary Surgery Affiliated Hospital of Qinghai University, Qinghai, 810001, P. R. China.

*Number of pages: 5*

*Number of figures: 3*

*Number of tables: 1*

Correspondence and requests for materials should be addressed:

H.F. (Email: [fanhaining@medmail.com.cn](mailto:fanhaining@medmail.com.cn))

F.Q. (Email: [qianfeng@tsinghua.edu.cn](mailto:qianfeng@tsinghua.edu.cn))

Manuscript for *ACS Infectious Diseases*

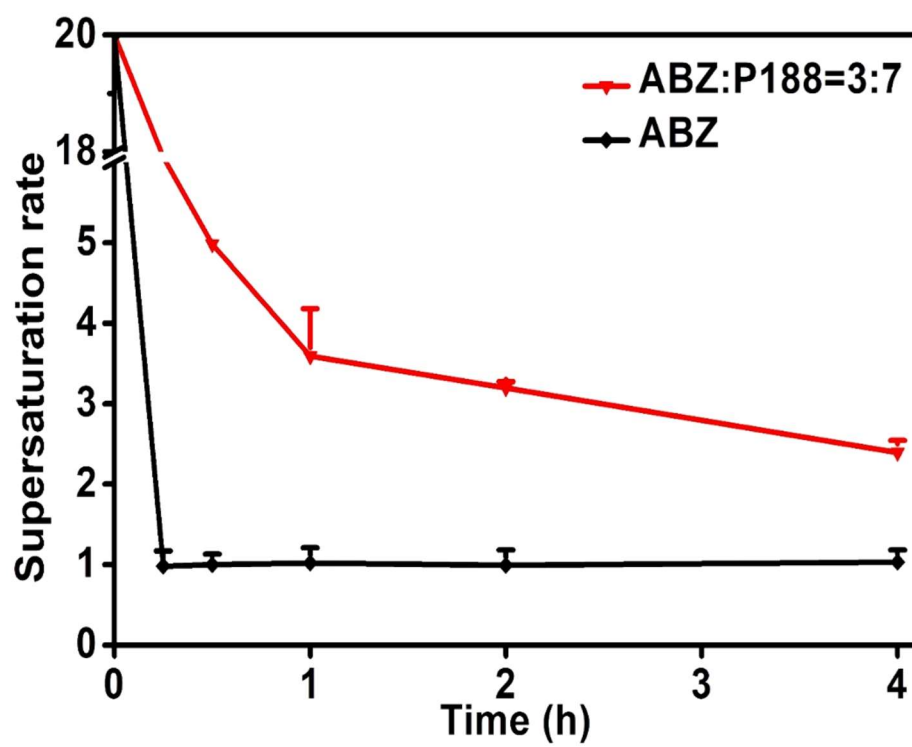

Figure S1. Effect of P188 on the supersaturation of ABZ in FaSSIF.

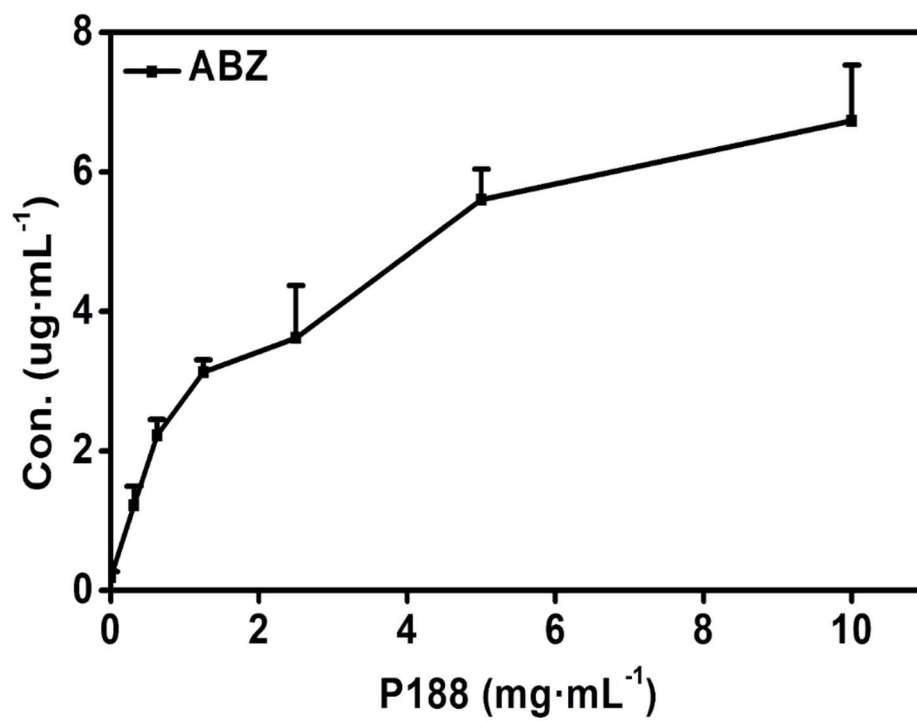

**Figure S2.** Equilibrium solubility of ABZ at different concentrations of P188.

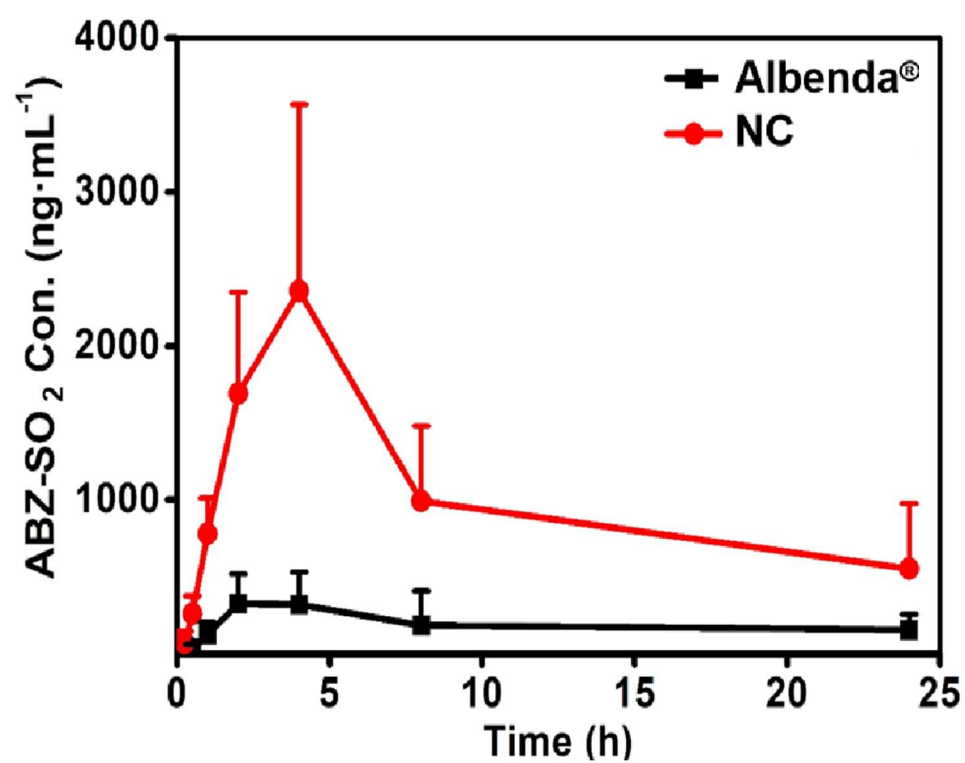

Figure S3. The drug concentration-time curve of ABZ-SO<sub>2</sub> from Albenda® and NC.

**Table S1.** Pharmacokinetics parameters of ABZ-SO<sub>2</sub> from Albenda<sup>®</sup> and NC *in vivo*

| Analyte             |                    | Albenda <sup>®</sup> | NC               |
|---------------------|--------------------|----------------------|------------------|
| ABZ-SO <sub>2</sub> | $T_{\max}$ (h)     | 13.3 ± 12.4          | 7.2 ± 8.2        |
|                     | $C_{\max}$ (ng/mL) | 835.2 ± 1091.9       | 2402.1 ± 1154.2  |
|                     | AUC (hr/ng/mL)     | 7546.5 ± 10812.5     | 20116.9 ± 8416.2 |
